# Supplementary material for: Hepatitis E Virus Produced from Cell Culture Has a Lipid Envelope
Source: PLoS One. 2015 Jul 10;10(7):e0132503. doi: 10.1371/journal.pone.0132503 (PMC4498737; doi:10.1371/journal.pone.0132503)
Supplement: S1 Table — (XLSX) [file pone.0132503.s003.xlsx]

## Sheet: Sheet1
protein	RNA	Ct	RNA content(copies/ml)
	HEV RNA	14.59	13300000
ORF2 protein	sendai virus RNA	18.9926	765000000
The protein of 293FT	HEV RNA	19.4004	640000
	sendai virus RNA	19.0882	591000
No protein	HEV RNA	19.1973	592000
